# Supplementary material for: Gauge-adjusted rainfall estimates from commercial microwave links
Source: Copernicus journal article supplement (doi:10.5194/hess-21-617-2017), 2017-01-31
Supplement: Supplementary file 1 [file hess-21-617-2017-supplement.pdf]

Supplement of Hydrol. Earth Syst. Sci., 21, 617–634, 2017  
<http://www.hydrol-earth-syst-sci.net/21/617/2017/>  
doi:10.5194/hess-21-617-2017-supplement  
© Author(s) 2017. CC Attribution 3.0 License.

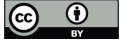

*Supplement of*

## **Gauge-adjusted rainfall estimates from commercial microwave links**

**Martin Fencel et al.**

*Correspondence to:* Martin Fencel ([martin.fencel@fsv.cvut.cz](mailto:martin.fencel@fsv.cvut.cz))

The copyright of individual parts of the supplement might differ from the CC-BY 3.0 licence.

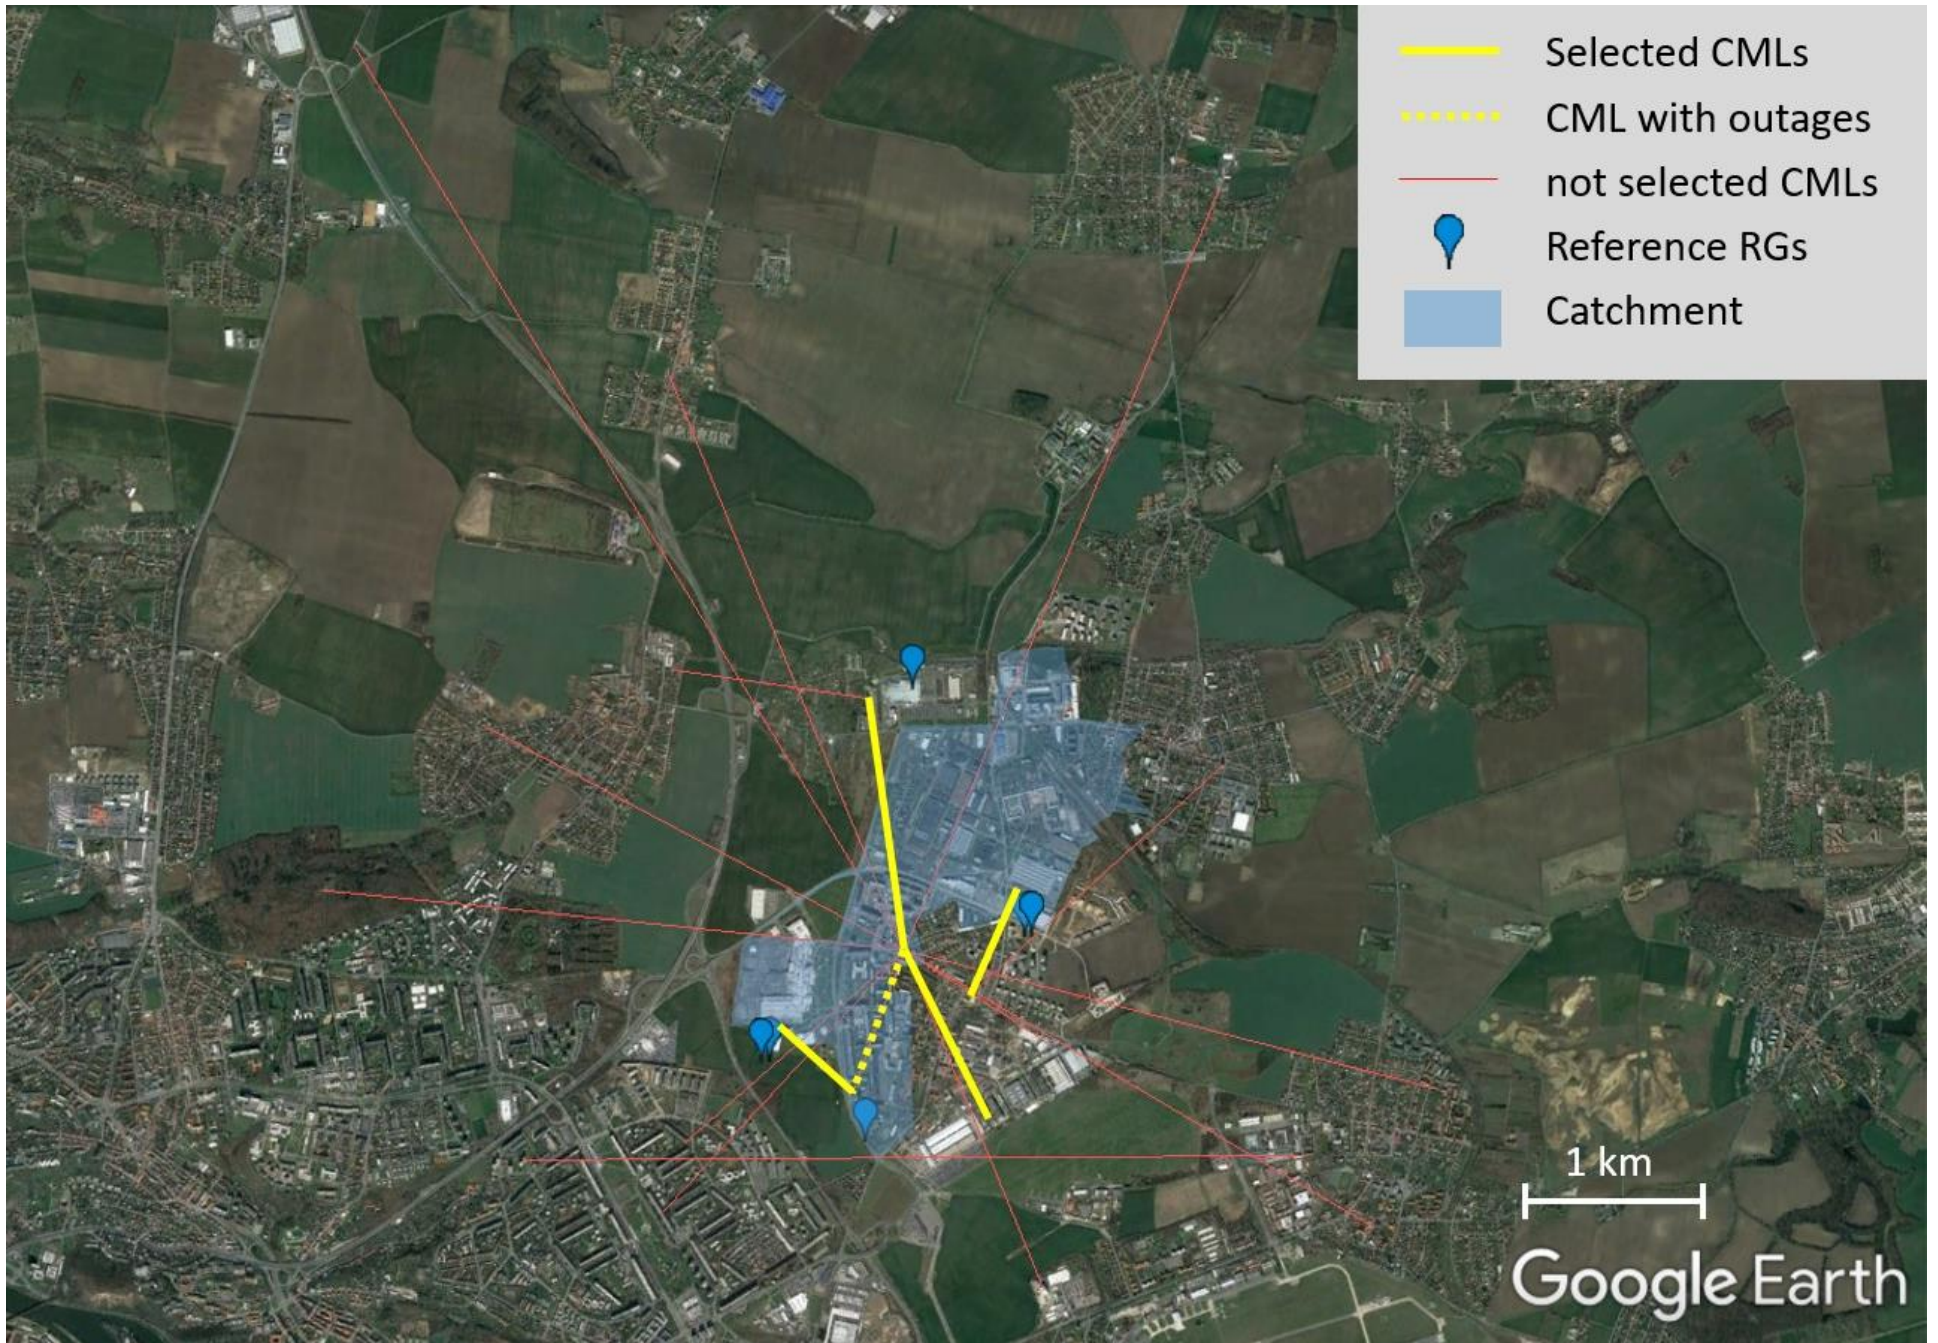

Detailed view on the network of commercial microwave links (CMLs) operated by T-Mobile (CZ) in the catchment Prague-Letnany together with reference rain gauges (RGs) operated for experimental purposes. Exact coordinates of CMLs are not provided due to confidential character of this information.
